# Supplementary material for: Evaluation of Greenness of LC-MS Chromatographic Methods for Simultaneous Analysis of Mixtures of Serotonin, Dopamine, Acetylcholine, GABA and Glutamate: AGREE Tool Application
Source: MDPI journal article supplement (doi:10.3390/separations9060147), 2022-06-08
Supplement: s1 [file s1]

Archive with 1 entries (1 files):
- separations-1739698-supplementary file S1.pdf
